# Supplementary material for: Decision aids for respite service choices by carers of people with dementia: development and pilot RCT
Source: Springer Nature journal article supplement (doi:10.1186/1472-6947-12-21), 2012-03-19
Supplement: 12911_2011_470_MOESM1_ESM.pdf [file 12911_2011_470_MOESM1_ESM.pdf]

125 self-identified primary carers of community-dwelling people with dementia contacted by service organisations - 32 contacted study and assessed for eligibility

Excluded – met exclusion criteria of a mental illness (n=1)

Randomized (n=31)

Allocated to intervention (n=15)

- Received allocated intervention (n=14)
- Received but did not use intervention (n=1)

Usual care (n=16)

Lost to follow up

- Carer admitted to hospital (n=1)
- Care recipient died (n=1)

Lost to follow up (n=0)

Analyzed

Intention to treat analysis (n= 15)  
Per protocol analysis (n=13)

Analyzed

Intention to treat analysis (n=16)  
Per protocol analysis (n=16), excepting DCS scores (n=13)

Received Gold Book decision aid (n=16)  
No further follow-up.
